# Supplementary material for: Effects of Endohedral Gd-Containing Fullerenols with a Different Number of Oxygen Substituents on Bacterial Bioluminescence
Source: MDPI journal article supplement (doi:10.3390/ijms25020708), 2024-01-05
Supplement: s1 [file s1]

## CARTESIAN COORDINATES

Atomic Cartesian coordinates for equilibrium structures of studied complexes of C<sub>82</sub> fullerenols (in Å: X, Y, Z) are presented below.

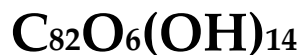

### Isomer – I<sub>1</sub>

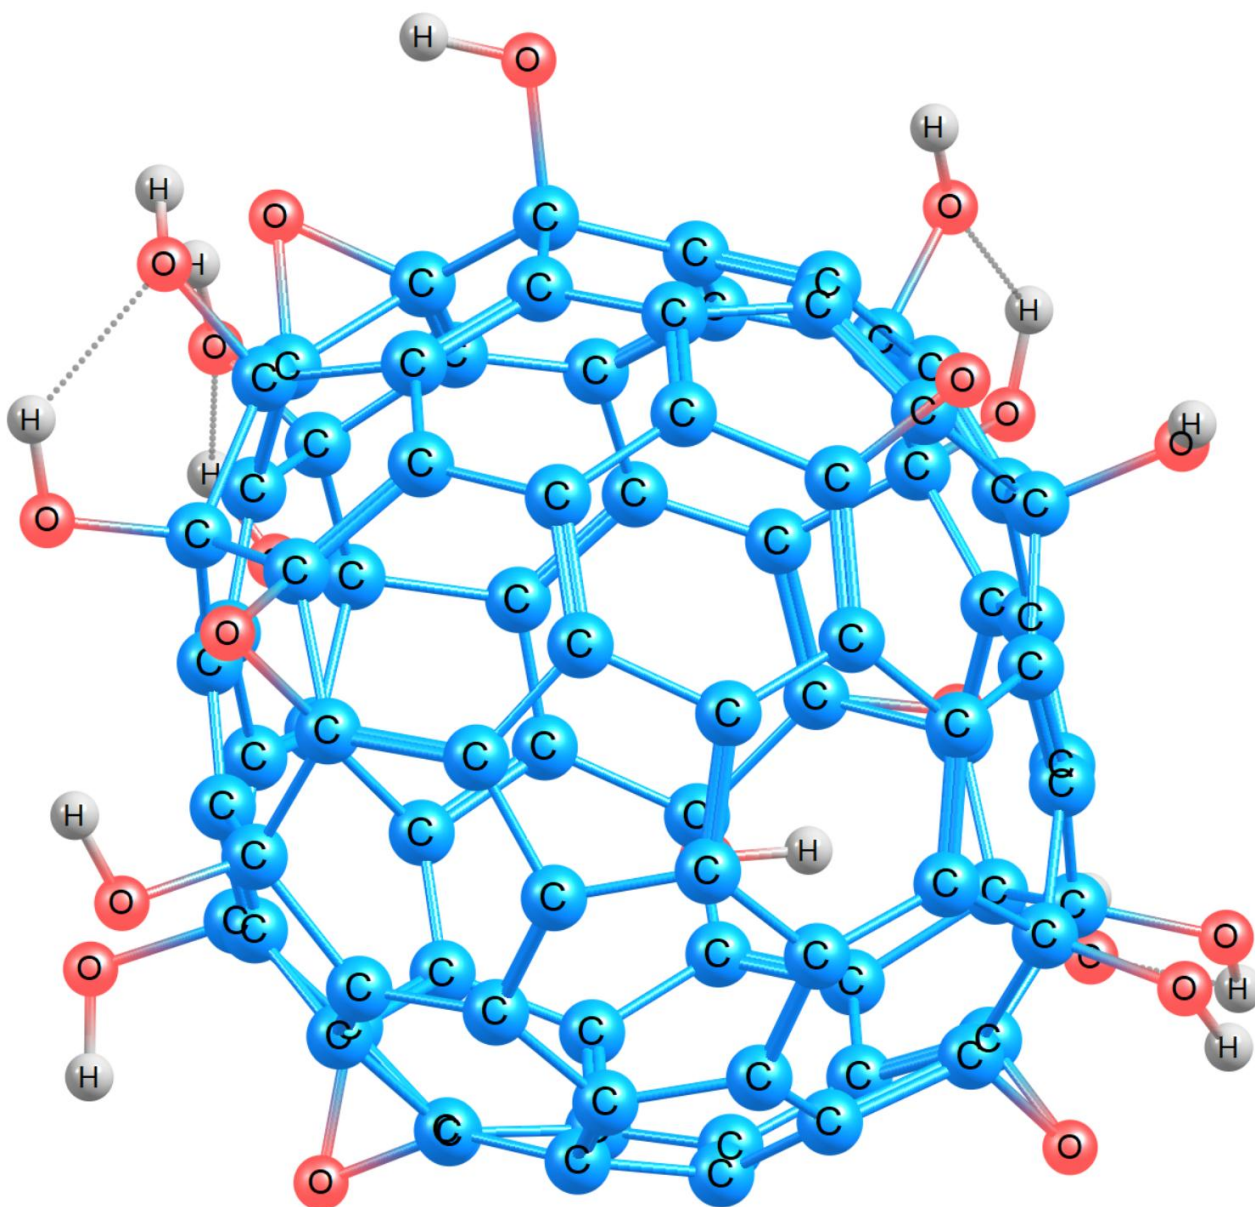

**Figure S1.** Atomic structure of C<sub>82</sub>O<sub>20</sub>H<sub>14</sub> (Isomer – I<sub>1</sub>). Carbon, oxygen, and hydrogen atoms are shown in blue, red, and grey, respectively.

### DFTB3/3ob-3-1// Ground state

|   |                 |                 |                |
|---|-----------------|-----------------|----------------|
| C | -2.698951913800 | -0.000958320600 | 2.971670907500 |
| C | 2.701075522500  | -0.135266558400 | 2.967496399000 |
| C | -3.364705153900 | 1.257122477900  | 2.377862926600 |
| C | 3.091315848000  | 0.985409236900  | 2.154770878500 |
| C | -3.090259171100 | -1.138153409200 | 2.183382211600 |
| C | 3.366629163400  | -1.406076248700 | 2.400870441700 |

|   |                 |                 |                 |
|---|-----------------|-----------------|-----------------|
| C | -3.706068098100 | 0.724784034800  | 0.940137722000  |
| C | 3.722492905500  | 0.524290152900  | 0.976742175700  |
| C | -3.724078832800 | -0.703452468400 | 0.996864617600  |
| C | 3.705820798300  | -0.905050028900 | 0.950656014500  |
| C | 2.501844403300  | 3.172709634600  | 1.060458181800  |
| C | -2.462255308300 | 3.334888673700  | 1.055914355900  |
| C | 2.461900229000  | -3.511601113100 | 1.124987790300  |
| C | -2.502283098400 | -3.348221191700 | 1.134670277000  |
| C | 4.014451509900  | 1.353522572100  | -0.271163678600 |
| C | -3.615611824300 | 1.434030816500  | -0.245938869700 |
| C | 3.610454830900  | -1.638938731500 | -0.219493618000 |
| C | -4.020179862600 | -1.560256208300 | -0.232152794500 |
| C | 3.267654855000  | 2.729653452400  | -0.182640962100 |
| C | -3.389747101400 | 2.972175332000  | -0.168773853100 |
| C | 3.386581228700  | -3.174898173000 | -0.109018810600 |
| C | -3.272548163300 | -2.932635045000 | -0.118019071500 |
| C | -2.417418220800 | 2.482974774000  | 2.330713803700  |
| C | 2.373162180200  | 2.241416038600  | 2.206251429500  |
| C | -2.371947432900 | -2.393585841900 | 2.259622041500  |
| C | 2.419377970200  | -2.632380690100 | 2.381327258200  |
| C | -3.549278882500 | 0.702377241700  | -1.519189443900 |
| C | 3.617805778200  | 0.549824531100  | -1.539796961100 |
| C | -3.626997660600 | -0.784512881200 | -1.520037377100 |
| C | 3.541657692100  | -0.937075810600 | -1.510454739200 |
| C | -2.580009920300 | 3.605054059600  | -1.403573834800 |
| C | 2.466983851300  | 3.234538776800  | -1.335409014200 |
| C | -2.473762604500 | -3.460009606300 | -1.261871360400 |
| C | 2.576094170800  | -3.831784511600 | -1.328731813100 |
| C | 2.453401715700  | 2.521738620400  | -2.504045835300 |
| C | -2.500190972700 | 2.698581884500  | -2.623869764600 |
| C | 2.502831087100  | -2.958741487000 | -2.573940483500 |
| C | -2.461215735700 | -2.771497003000 | -2.445710137100 |
| C | -3.117308478200 | 1.348273361500  | -2.662466477800 |
| C | 3.136249547900  | 1.225795355700  | -2.627931201500 |
| C | -3.142411338000 | -1.479854750800 | -2.594547452200 |
| C | 3.104099059500  | -1.605437629100 | -2.637926658300 |
| C | -2.607747706000 | 0.666276814600  | -3.956802195700 |
| C | 2.605215686100  | 0.603010969700  | -3.923848628100 |
| C | -2.624898176400 | -0.889267282600 | -3.917468715500 |
| C | 2.609273650300  | -0.955025758100 | -3.961913753100 |
| C | -1.228301417800 | 2.642534637100  | -3.482943465700 |
| C | 1.262800819200  | 2.486067585800  | -3.338816157500 |
| C | -1.274685334600 | -2.756809527400 | -3.285333517800 |
| C | 1.219067999600  | -2.919602672900 | -3.439567986400 |
| C | -1.195475986800 | 1.276022190900  | -4.084945428000 |
| C | 1.218846595100  | 1.285059911400  | -4.003099972700 |
| C | -1.231237861800 | -1.569031462200 | -3.972086460600 |
| C | 1.187463107900  | -1.564624495100 | -4.063605917900 |
| C | -1.166240958500 | 3.881226385000  | -0.855978146900 |
| C | 1.238551307400  | 3.859147856100  | -0.848289902300 |
| C | -1.243177123300 | -4.070303434500 | -0.763074663600 |
| C | 1.161921370500  | -4.092252360800 | -0.774065577600 |
| C | -1.173246174300 | 3.863250544300  | 0.552153033400  |
| C | 1.251090494800  | 3.854625205600  | 0.566358064600  |
| C | -1.252997920400 | -4.038371268000 | 0.651758912600  |
| C | 1.171586773900  | -4.047338980600 | 0.633587127100  |

|   |                 |                 |                 |
|---|-----------------|-----------------|-----------------|
| C | 1.208382399700  | 2.291487254900  | 2.959897557400  |
| C | -1.100767549800 | 2.386136089400  | 2.994357564900  |
| C | 1.104102928900  | -2.521132475700 | 3.045471841800  |
| C | -1.205591517300 | -2.426209122500 | 3.012034602600  |
| C | -0.676504206500 | 1.186153033200  | 3.693726455900  |
| C | 0.733094388200  | 1.133509474600  | 3.680279476600  |
| C | -0.729470420300 | -1.253760846900 | 3.707511096600  |
| C | 0.680389302700  | -1.305988319400 | 3.718296424800  |
| C | 1.476010001300  | -0.105176694300 | 3.653752239000  |
| C | -1.472134882500 | -0.015992686900 | 3.655412716300  |
| C | -0.025667168400 | 0.593064628500  | -4.305248794400 |
| C | 0.014749589300  | -0.888152684100 | -4.292232795400 |
| C | 0.063986160600  | 3.421494865100  | -3.104136931200 |
| C | -0.073497645000 | -3.684211067800 | -3.032098556200 |
| C | 0.028437244500  | 3.849101291300  | -1.595850332600 |
| C | -0.033945652100 | -4.073174284700 | -1.511869274600 |
| C | 0.038501803000  | 3.778949865500  | 1.292342896300  |
| C | -0.039035584700 | -3.948146227100 | 1.373572560100  |
| C | 0.031391661300  | 3.075525233100  | 2.556080928100  |
| C | -0.029013000600 | -3.217556037200 | 2.621721330300  |
| O | -3.222092567200 | 4.835796995200  | -1.767105371400 |
| H | -3.205522050900 | 4.918727373800  | -2.738289745400 |
| O | -4.661190355000 | 3.579968920300  | -0.048777625200 |
| H | -4.593008787300 | 4.495089192800  | -0.380219336100 |
| O | -5.432171384000 | -1.840339608700 | -0.309192889900 |
| H | -5.632393872200 | -2.574071685700 | 0.299129604800  |
| O | -3.796002174400 | -3.903063961900 | 0.794324974100  |
| O | 4.659219279300  | -3.778594023900 | 0.021381903900  |
| H | 4.600064390600  | -4.685359487900 | -0.336691401500 |
| O | 3.215549574600  | -5.072219671900 | -1.663809036600 |
| O | 5.425764575900  | 1.632396537800  | -0.364901446200 |
| H | 5.639342480300  | 2.343117136500  | 0.265757999700  |
| O | 2.376147747800  | -3.696664593100 | -3.799885394200 |
| O | -0.197131235500 | -4.854666729200 | -3.848339246800 |
| O | -3.407473831900 | -1.403480270900 | -4.994044359400 |
| H | -3.811631048600 | -0.655252973700 | -5.472754667100 |
| O | -3.406035845600 | 1.104045822000  | -5.071915895300 |
| H | -3.376941883900 | 2.080922660800  | -5.091084303000 |
| O | 4.550204591000  | -1.740256577100 | 3.118311770000  |
| O | 3.062384655800  | -3.922560058200 | 2.350010793600  |
| O | 3.399834442700  | -1.431184230200 | -5.043580241800 |
| H | 3.783745630600  | -0.668980018700 | -5.514974493100 |
| O | 3.402308914400  | 1.071686222900  | -5.032307099000 |
| H | 3.460348340200  | 2.041827177800  | -4.995674873400 |
| O | 0.193572056300  | 4.564742171400  | -3.958235913200 |
| H | -0.686244374800 | 4.957211611000  | -4.091188890100 |
| O | -2.398771284900 | 3.409216123600  | -3.886234389200 |
| O | -3.060426631100 | 3.772672585300  | 2.272494875900  |
| O | 3.793978856200  | 3.721224914200  | 0.706319993300  |
| H | 3.214117574000  | -5.166936923400 | -2.634931666000 |
| O | -4.547489329100 | 1.606961437500  | 3.089221509200  |
| H | -4.772130812700 | 2.528732326200  | 2.864998367500  |
| H | 0.692269435200  | -5.177079031800 | -4.074095180000 |
| H | 4.769176910400  | -2.669486842300 | 2.919794741100  |

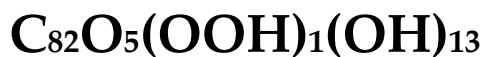

## Isomer – I<sub>2</sub>

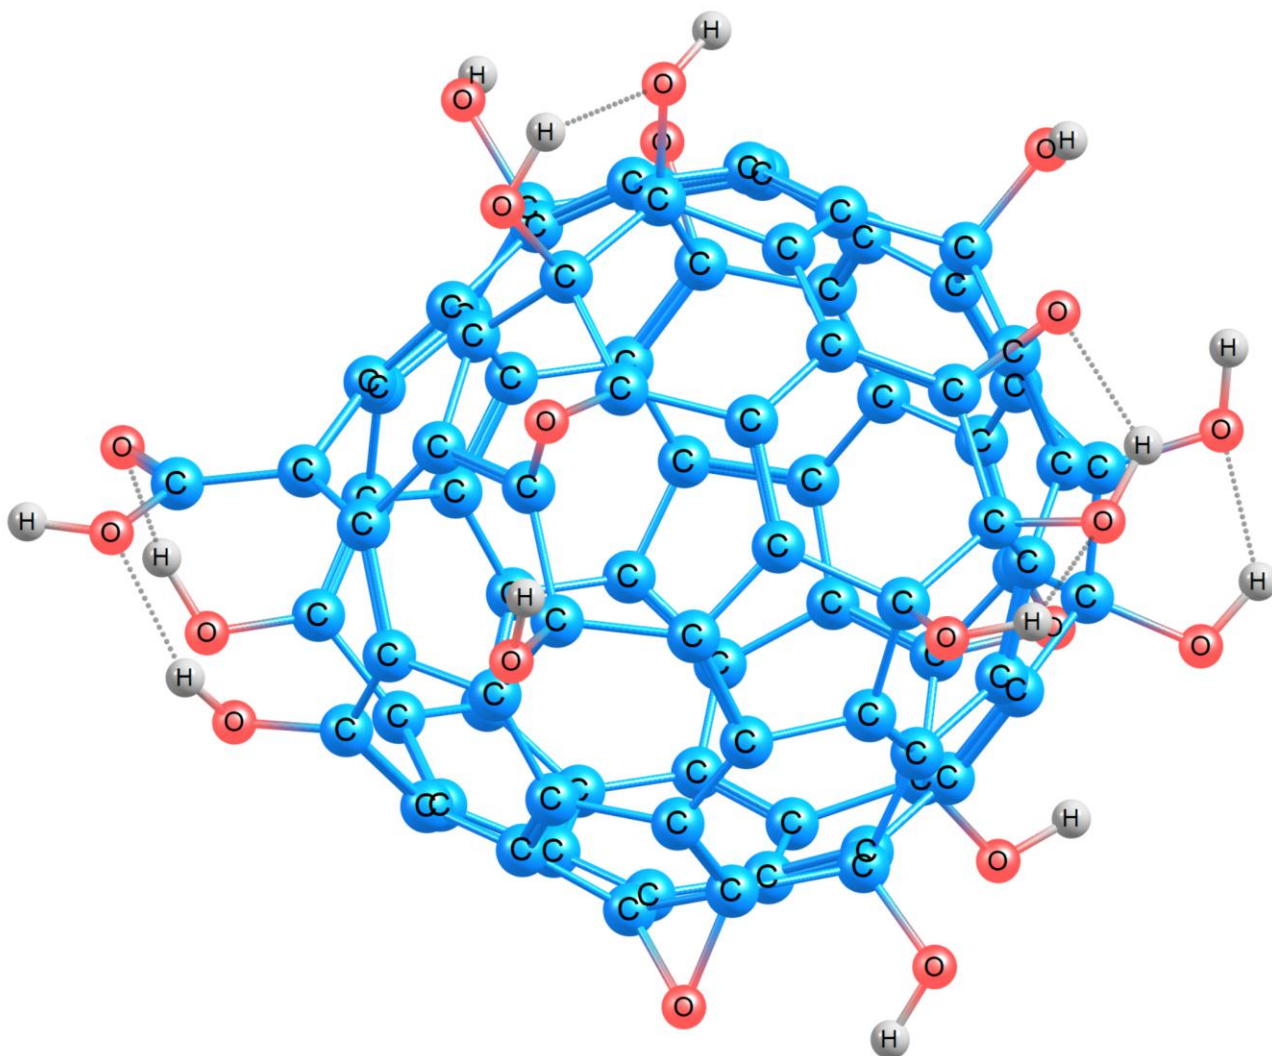

**Figure S2.** Atomic structure of  $\text{C}_{82}\text{O}_{20}\text{H}_{14}$  (Isomer – I<sub>2</sub> ( $\text{C}_{82}\text{O}_5(\text{OOH})_1(\text{OH})_{13}$ )). Carbon, oxygen, and hydrogen atoms are shown in blue, red, and grey, respectively.

### DFTB3/3ob-3-1// Ground state

|   |                 |                 |                 |
|---|-----------------|-----------------|-----------------|
| C | -2.729787734500 | -0.041683268800 | 2.979925608500  |
| C | 2.604649220200  | -0.166588485200 | 2.871308331600  |
| C | -3.393897003000 | 1.216893029200  | 2.389404321200  |
| C | 3.063855803500  | 0.966055041700  | 2.142179725400  |
| C | -3.117470233800 | -1.161964719000 | 2.223005471100  |
| C | 3.113985351800  | -1.356394926700 | 2.276837702900  |
| C | -3.779890047000 | 0.679551304400  | 0.965141852500  |
| C | 3.779138675400  | 0.485695693300  | 1.003121629100  |
| C | -3.799465807100 | -0.699551664400 | 1.005781768000  |
| C | 3.805919639200  | -0.935579842100 | 1.030635092200  |
| C | 2.486271475400  | 3.149414077700  | 1.092752528400  |
| C | -2.487235942700 | 3.283991569100  | 1.058002263500  |
| C | 4.385710958400  | -3.987428897800 | 0.393601405300  |
| C | -2.514294959900 | -3.312675245400 | 1.131022815400  |
| C | 4.054659710200  | 1.341793977500  | -0.239978559700 |
| C | -3.713319809700 | 1.423224240300  | -0.264859343800 |

|   |                 |                 |                 |
|---|-----------------|-----------------|-----------------|
| C | 3.740048508600  | -1.663154784200 | -0.233826185200 |
| C | -4.068282297400 | -1.551456595400 | -0.236591619000 |
| C | 3.267074290200  | 2.703146570000  | -0.147974301500 |
| C | -3.420150082700 | 2.953152019300  | -0.176053975700 |
| C | 3.459492363600  | -3.086622615500 | -0.271669302800 |
| C | -3.290147185400 | -2.904482729300 | -0.123378744400 |
| C | -2.445920982300 | 2.439003750900  | 2.332596496300  |
| C | 2.351505240100  | 2.209052839600  | 2.224691849000  |
| C | -2.378065948300 | -2.385681532500 | 2.262063837900  |
| C | 2.550494748200  | -2.592120653700 | 2.760148729300  |
| C | -3.654821672200 | 0.723221543200  | -1.480546300500 |
| C | 3.658356735400  | 0.550236152800  | -1.511998970500 |
| C | -3.678307250300 | -0.751049485000 | -1.515893152300 |
| C | 3.590279573400  | -0.917341679600 | -1.461495785200 |
| C | -2.572859787500 | 3.551617911900  | -1.400125949000 |
| C | 2.460605738000  | 3.199712853000  | -1.301038386800 |
| C | -2.468095606500 | -3.412190210000 | -1.253688606100 |
| C | 2.424858458900  | -3.548083219700 | -1.208384954800 |
| C | 2.439793245600  | 2.484062788400  | -2.472372943900 |
| C | -2.433302833100 | 2.607463353500  | -2.568169778400 |
| C | 2.354511883300  | -2.823792773000 | -2.402656094900 |
| C | -2.445111674100 | -2.700965127100 | -2.427535520200 |
| C | -3.021806579300 | 1.378369338800  | -2.621848587100 |
| C | 3.153026320100  | 1.214468703100  | -2.604421137300 |
| C | -3.149964991800 | -1.430887019700 | -2.588983270500 |
| C | 3.033349793000  | -1.592220216500 | -2.562977268700 |
| C | -2.624171757600 | 0.695988436900  | -3.953872871400 |
| C | 2.634074541800  | 0.585476118600  | -3.902284622600 |
| C | -2.630249775500 | -0.851430364600 | -3.921116951000 |
| C | 2.660582219700  | -0.966622207100 | -3.918176771800 |
| C | -1.237087667100 | 2.666027170600  | -3.492082588300 |
| C | 1.261502803300  | 2.448400487300  | -3.321303788800 |
| C | -1.262904008100 | -2.685632235200 | -3.257707865900 |
| C | 1.215475841200  | -2.901325082200 | -3.369841276100 |
| C | -1.232916347100 | 1.357237766300  | -4.247630592500 |
| C | 1.237210540700  | 1.249630373100  | -4.017138283700 |
| C | -1.229417274400 | -1.513556702700 | -3.994631933700 |
| C | 1.249377768000  | -1.627379712000 | -4.193284188100 |
| C | -1.174584241300 | 3.841834998200  | -0.839933343300 |
| C | 1.229644303500  | 3.819309618600  | -0.818488814500 |
| C | -1.258286196900 | -4.057679601200 | -0.749845646800 |
| C | 1.178431787100  | -4.237804835300 | -0.745163792600 |
| C | -1.191782261700 | 3.814124596700  | 0.567344239400  |
| C | 1.233463187700  | 3.820061210200  | 0.595497301100  |
| C | -1.275533913200 | -4.002864234900 | 0.671961829600  |
| C | 1.056146517000  | -4.527214163000 | 0.663044435900  |
| C | 1.183059887800  | 2.260774870300  | 2.991970845300  |
| C | -1.136398411400 | 2.345462322800  | 3.017186668500  |
| C | 1.135806953700  | -2.560765444000 | 3.164003438400  |
| C | -1.188477842800 | -2.444969636600 | 3.006392404600  |
| C | -0.720221245500 | 1.154416653200  | 3.721169378200  |
| C | 0.704921479300  | 1.109513022300  | 3.713700185000  |
| C | -0.759261208000 | -1.284522162500 | 3.719432841700  |
| C | 0.664354034000  | -1.321876063200 | 3.753028692100  |
| C | 1.421237768600  | -0.125346540100 | 3.680926285200  |
| C | -1.493189455900 | -0.054008972700 | 3.685416108800  |

|   |                 |                 |                 |
|---|-----------------|-----------------|-----------------|
| C | 0.027641666900  | 0.563868335300  | -4.404073279000 |
| C | -0.010956848500 | -0.841105721800 | -4.379872832700 |
| C | 0.066023476500  | 3.397532680500  | -3.064047395600 |
| C | -0.078966610100 | -3.617867787300 | -2.952138753900 |
| C | 0.025940272500  | 3.804323983300  | -1.571151370800 |
| C | -0.040603495400 | -4.029551730800 | -1.463660558000 |
| C | 0.015929209800  | 3.734541954900  | 1.314455391400  |
| C | -0.084714990300 | -4.065044943100 | 1.422151549000  |
| C | 0.005207318700  | 3.027395396800  | 2.575448093000  |
| C | -0.001404449100 | -3.255579408000 | 2.648537741300  |
| O | -3.212483344800 | 4.781746362900  | -1.804400839300 |
| H | -2.655475542700 | 5.227921616400  | -2.464606881000 |
| O | -4.667901524000 | 3.611700514900  | -0.055465659000 |
| H | -4.596993518000 | 4.487546254800  | -0.477712508200 |
| O | -5.470540352800 | -1.866005624900 | -0.339140901500 |
| H | -5.672805840200 | -2.574930464000 | 0.296538700800  |
| O | -3.796901699200 | -3.888455099400 | 0.782770263900  |
| O | 5.229355860400  | -3.682486929100 | 1.261751275900  |
| H | 4.186172270200  | -3.572717191400 | 2.623831036800  |
| O | 2.047785403300  | -5.117489373900 | 1.309206697800  |
| O | 5.455040929600  | 1.665856578000  | -0.354321362300 |
| H | 5.652908249200  | 2.374351687000  | 0.283574829000  |
| O | 1.442089871900  | -2.927488545200 | -4.785817400100 |
| O | -0.196142202700 | -4.824231483400 | -3.734143882200 |
| O | -3.401969294100 | -1.368274692400 | -5.004682223900 |
| H | -3.944537774100 | -0.640986382100 | -5.366586030500 |
| O | -3.553312782800 | 1.132389530000  | -4.953728147300 |
| H | -3.245580465500 | 2.002853143300  | -5.280123184700 |
| O | 4.383861965400  | -5.284155130200 | -0.070635095600 |
| O | 3.247156463900  | -3.678300681200 | 2.923550944600  |
| O | 3.594003382400  | -1.441808742400 | -4.877865780600 |
| H | 3.825804425900  | -0.712947777000 | -5.481579525500 |
| O | 3.431270998100  | 1.052594022800  | -5.014255566400 |
| H | 3.547858960200  | 2.014599635500  | -4.936520170700 |
| O | 0.197546457800  | 4.582259453800  | -3.870281871400 |
| H | -0.011826326400 | 4.342704603100  | -4.791186695600 |
| O | -1.430208966100 | 2.624794549700  | -4.930281119500 |
| O | -3.091337738200 | 3.726113108100  | 2.275484227700  |
| O | 3.773682669100  | 3.706287534000  | 0.742801957800  |
| H | 2.706908016300  | -5.499248524400 | 0.696704525700  |
| O | -4.563631634100 | 1.577698165100  | 3.120692645400  |
| H | -4.777389242800 | 2.503392802600  | 2.899093781200  |
| H | 0.114720145100  | -4.623184301900 | -4.636492140500 |
| H | 5.157049342000  | -5.745714571900 | 0.300754352100  |



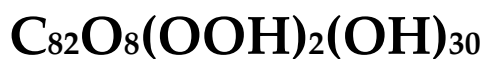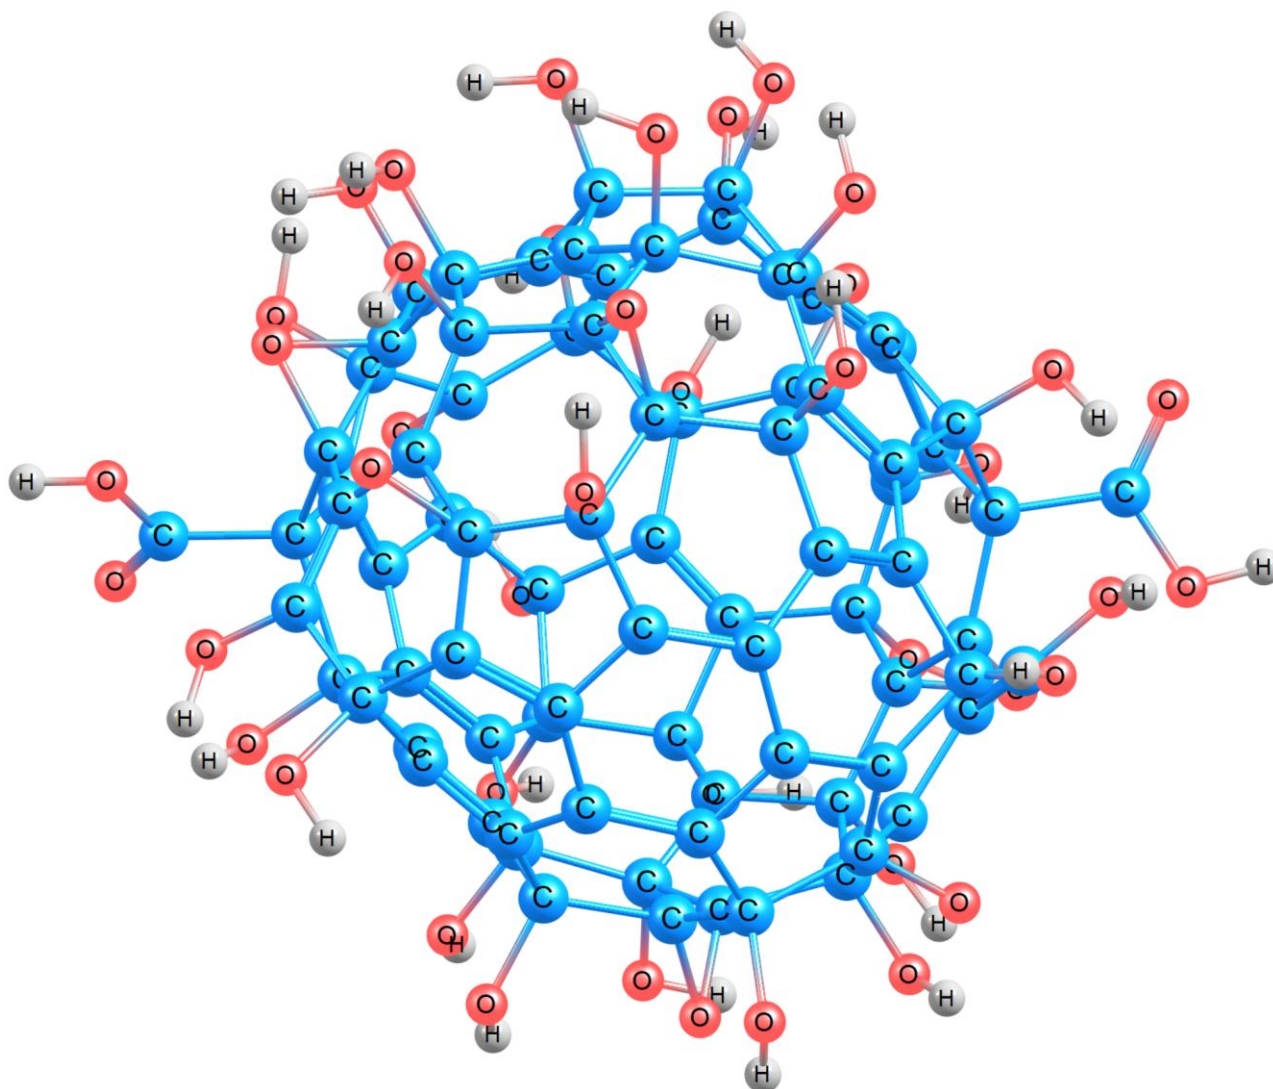

**Figure S3.** Atomic structure of  $\text{C}_{82}\text{O}_8\text{H}_{32}$ . Carbon, oxygen, and hydrogen atoms are shown in blue, red, and grey, respectively.

#### DFTB3/3ob-3-1// Ground state

|   |                 |                 |                 |
|---|-----------------|-----------------|-----------------|
| C | -2.631507149796 | 0.088513923982  | 3.138417932570  |
| C | 2.644213942815  | -0.135892783955 | 3.124230423607  |
| C | -2.861853454726 | 1.219169912423  | 2.378691770906  |
| C | 3.268019888505  | 1.060932571503  | 2.427489139920  |
| C | -3.258732073548 | -1.102546749525 | 2.434859332892  |
| C | 2.870769655700  | -1.260299756417 | 2.354187987934  |
| C | -3.272019928535 | 0.813847877626  | 0.995651462525  |
| C | 3.433430666464  | 0.517582102755  | 0.997943779573  |
| C | -3.430734685443 | -0.547552649778 | 1.010677937565  |
| C | 3.274617109517  | -0.843650591639 | 0.972576144535  |
| C | 2.417190360881  | 3.251805111502  | 1.298286724386  |
| C | -2.525774117860 | 3.547972696371  | 1.824458491198  |
| C | 2.531836650878  | -3.584332780380 | 1.782577769189  |
| C | -2.413705175918 | -3.284225095495 | 1.283813540409  |
| C | 3.874593617250  | 1.433879881357  | -0.134988901958 |
| C | -3.673799375337 | 1.577409823284  | -0.334867180864 |
| C | 3.669485113349  | -1.596194081274 | -0.366041247821 |
| C | -3.878078003262 | -1.454548034325 | -0.127202987921 |
| C | 3.191534608536  | 2.891751193679  | -0.009788692018 |

|   |                 |                 |                 |
|---|-----------------|-----------------|-----------------|
| C | -3.990075710167 | 4.124048128142  | -1.255630783426 |
| C | 3.980375909185  | -4.135535299103 | -1.309159656401 |
| C | -3.194738856526 | -2.913548684664 | -0.017387720018 |
| C | -2.480497381859 | 2.596375505842  | 2.992409478663  |
| C | 2.439122322896  | 2.379474801943  | 2.514636568857  |
| C | -2.429602213892 | -2.421840171887 | 2.507331745839  |
| C | 2.492420203863  | -2.642431053803 | 2.958567950639  |
| C | -3.537254181399 | 0.582936032715  | -1.515652057288 |
| C | 3.517753689411  | 0.763806377657  | -1.482432537326 |
| C | -3.528301609385 | -0.773555649673 | -1.470952166346 |
| C | 3.526409707426  | -0.592256696719 | -1.538161121278 |
| C | -2.857000814684 | 3.036287047634  | -1.048281056498 |
| C | 2.155129802000  | 3.150019835562  | -1.055461969542 |
| C | -2.163823993009 | -3.163687142545 | -1.070422982499 |
| C | 2.848659497692  | -3.049844681627 | -1.087388479504 |
| C | 2.388443363894  | 2.872298747705  | -2.503099639889 |
| C | -2.530292196857 | 2.489031751866  | -2.419242793892 |
| C | 2.514870151875  | -2.491081695892 | -2.451976344880 |
| C | -2.404296744904 | -2.873875808674 | -2.514507268841 |
| C | -3.082051383587 | 1.287337260430  | -2.686618088804 |
| C | 3.323193910469  | 1.623729749257  | -2.767302319757 |
| C | -3.340366714461 | -1.623052865250 | -2.763733348731 |
| C | 3.065213615629  | -1.287216423440 | -2.712382038760 |
| C | -2.520718477858 | 0.631751033703  | -3.888241559257 |
| C | 2.552669195827  | 0.896627991593  | -3.988461037183 |
| C | -2.575893813822 | -0.886084290590 | -3.982900163192 |
| C | 2.497915564864  | -0.621915568714 | -3.905810871210 |
| C | -1.507835084304 | 2.892563364708  | -3.486356937417 |
| C | 1.023057634538  | 2.512623631837  | -3.114263258572 |
| C | -1.041950490547 | -2.509127662876 | -3.129501352599 |
| C | 1.487082683301  | -2.885978885701 | -3.517290340383 |
| C | -1.353222668395 | 1.479649234333  | -4.305810722071 |
| C | 1.109518143515  | 1.446178949338  | -3.927822837205 |
| C | -1.132432832502 | -1.436047679347 | -3.933817820218 |
| C | 1.328333455417  | -1.466418867311 | -4.324378929056 |
| C | -1.562772549274 | 3.741344870278  | -0.471909260808 |
| C | 1.115497112513  | 4.166864715091  | -0.646963337695 |
| C | -1.121836714483 | -4.183481491116 | -0.675342313707 |
| C | 1.557277969285  | -3.759397569296 | -0.510244579758 |
| C | -1.426585171339 | 3.751935615296  | 1.026971133555  |
| C | 1.212115434430  | 4.221059568111  | 0.946817535565  |
| C | -1.210514144445 | -4.250579608073 | 0.918408046558  |
| C | 1.428624294377  | -3.782202503271 | 0.989139320567  |
| C | 1.354653666390  | 2.524165147873  | 3.639296175353  |
| C | -1.096528983526 | 2.409621271931  | 3.577307984362  |
| C | 1.111339621507  | -2.460464924863 | 3.551723684367  |
| C | -1.339464211371 | -2.575645720817 | 3.625277967337  |
| C | -0.646470038716 | 1.202626082477  | 4.072074566158  |
| C | 0.801637135625  | 1.165425885451  | 4.078741910141  |
| C | -0.784221017627 | -1.220513452447 | 4.073052796130  |
| C | 0.663827178692  | -1.257609299424 | 4.058713882147  |
| C | 1.476083485309  | -0.041613509988 | 3.988109686192  |
| C | -1.459066760347 | -0.012777125015 | 3.995605953209  |
| C | -0.009488206019 | 0.864253457629  | -4.789989162824 |
| C | -0.017734849974 | -0.847193087609 | -4.796854534830 |
| C | -0.152329887952 | 3.447001195448  | -2.846341512689 |



|   |                 |                 |                 |
|---|-----------------|-----------------|-----------------|
| C | 0.134770262958  | -3.445581934446 | -2.875023127711 |
| C | -0.294642910859 | 3.843469975275  | -1.306981671431 |
| C | 0.284871790859  | -3.854506219273 | -1.339698483378 |
| C | -0.089615926978 | 3.852451703262  | 1.722551008227  |
| C | 0.095127895942  | -3.888406251229 | 1.690629397229  |
| C | 0.045045818978  | 3.225601466530  | 3.117281082603  |
| C | -0.032529487964 | -3.272857641520 | 3.091036926572  |
| O | -5.021332816741 | 1.888716596147  | -0.199392900916 |
| O | -3.706892168302 | 5.348965361587  | -0.763038672651 |
| O | 4.266842261064  | 3.842095864258  | -0.193596121930 |
| O | 5.287035858576  | 1.585777862299  | -0.038869726957 |
| O | 5.017599499719  | -1.908545355145 | -0.240602217913 |
| O | 3.699782221314  | -5.364449580557 | -0.824937046652 |
| O | -5.290081239618 | -1.607106005291 | -0.024645662007 |
| O | -4.271342809055 | -3.862032431267 | -0.203211405897 |
| O | -3.214999207567 | -1.276952193431 | -5.191893058622 |
| O | -2.508919304838 | 1.336106344391  | -5.147352529673 |
| O | 3.506088260384  | -3.026852866643 | 3.903887145219  |
| O | -2.043292750079 | 3.869080426257  | -4.341377177053 |
| O | 0.175138756942  | 4.684117011883  | -3.502196108430 |
| O | 2.479769234863  | -1.315999407390 | -5.170535193649 |
| O | 3.185716373529  | 1.297199048389  | -5.197458512642 |
| O | -0.196164180913 | -4.677346277884 | -3.539231120396 |
| O | 2.018226806082  | -3.855452100269 | -4.382936998992 |
| O | -3.222520327553 | -3.620101458384 | 2.413715251929  |
| O | -4.560633276934 | -1.346891088382 | 2.979546691652  |
| O | 4.572216002912  | 1.301215478414  | 2.968125588630  |
| O | 3.231746324552  | 3.578417506384  | 2.426833240913  |
| H | 1.285576186433  | -4.280014036047 | -4.864571089808 |
| H | -1.313158482393 | 4.296446900064  | -4.824331459798 |
| H | 5.587992754463  | 2.095269050026  | -0.813343572607 |
| H | 3.880143566218  | 4.722425717874  | -0.343979384857 |
| H | -3.885863441251 | -4.741321066838 | -0.362428886854 |
| H | -5.595302861475 | -2.109944659066 | -0.801815839628 |
| O | 5.023801989747  | -3.910587126209 | -1.895461359133 |
| O | 3.796489509305  | -3.839051288253 | 1.394732115359  |
| O | -5.036454337730 | 3.903780263216  | -1.838442465149 |
| O | -3.792391196297 | 3.806549266282  | 1.445426922320  |
| H | -5.187580933663 | 2.410547954905  | 0.599563252740  |
| H | 5.189479469653  | -2.432121104900 | 0.556067146746  |
| H | -4.426169112004 | 5.958726275320  | -0.995991964536 |
| H | 4.417942284997  | -5.972118643289 | -1.066602628520 |
| H | -3.085353559584 | -0.569102757754 | -5.848651145350 |
| H | 3.052611835612  | 0.594683785740  | -5.859236964364 |
| H | 5.048565868734  | 1.896831217152  | 2.360717587926  |
| H | -5.042341316725 | -1.932342351097 | 2.366584869938  |
| O | -3.489458994401 | 2.972733206640  | 3.945860203207  |
| H | -4.356120921050 | 3.687090326328  | 2.234648213986  |
| H | -3.527596689408 | 2.313767461963  | 4.659963097889  |
| H | 4.364328104045  | -3.725743077331 | 2.182019339005  |
| H | 3.547252836397  | -2.374290171917 | 4.623776731922  |
| O | 1.192140532445  | -4.962184563727 | -1.223161555469 |
| O | -1.201386738459 | 4.950034452738  | -1.176800789448 |
| H | -0.265312639891 | 5.405692969530  | -3.013380846650 |
| H | 0.245358788894  | -5.403126999528 | -3.057649829616 |
| O | -0.262706945875 | -1.218781082453 | -6.144776218235 |

|   |                 |                 |                 |
|---|-----------------|-----------------|-----------------|
| O | 0.228812948921  | 1.246708672442  | -6.136033196231 |
| H | -0.611651869734 | 1.185124184477  | -6.622183773009 |
| H | 0.575551908728  | -1.154194411455 | -6.634341007993 |
| O | 4.612296212931  | 2.037394114051  | -3.165243051559 |
| O | 2.945281661647  | 4.014739898193  | -3.185077530540 |
| O | -4.631432227898 | -2.033439752072 | -3.158492897581 |
| O | -2.964639075643 | -4.010525890158 | -3.203263769554 |
| H | -4.528155515941 | -2.627862800804 | -3.923577474201 |
| H | -2.296733572979 | -4.725289652874 | -3.185663385530 |
| H | 4.505137828952  | 2.638098444817  | -3.924869314243 |
| H | 2.277639193943  | 4.729418968843  | -3.157654990546 |
| O | -1.915785201125 | -3.282129667521 | 4.711851722850  |
| O | 0.143000008961  | -4.673577779888 | 2.931525772668  |
| O | 1.936495245140  | 3.221772764515  | 4.728645857868  |
| O | -0.131326719958 | 4.627548507906  | 2.970015189673  |
| H | 2.601641904812  | 3.841117538241  | 4.375435025010  |
| H | -2.583100914843 | -3.898215205232 | 4.357023430043  |
| O | -1.501985391297 | -5.471128233504 | -1.215013178459 |
| O | -1.568908948291 | -5.580085949461 | 1.279149547400  |
| O | 1.493527361299  | 5.458785718535  | -1.177908748492 |
| O | 1.572023489307  | 5.547680326492  | 1.316487272407  |
| H | 1.467101251322  | 6.095981943214  | -0.433184535826 |
| H | 1.197540255454  | 5.727115175380  | 2.203493137982  |
| H | -1.189432802472 | -5.767004163390 | 2.162495852043  |
| H | -1.476197564335 | -6.113474889229 | -0.474600692810 |

## CHARACTERIZATION OF Gd-CONTAINING FULLERENOLS

The assessment of water in the samples was performed by thermogravimetric analysis (TGA). The weight loss of  $\text{Gd@C}_{82}\text{O}_x(\text{OH})_y$ ,  $x+y=40-44$  and  $\text{Gd@C}_{82}\text{O}_x(\text{OH})_y$ ,  $x+y=20-24$  was observed from room temperature to 900 °C at a rate of 10 °C min<sup>-1</sup> under Ar flow at 90 mL min<sup>-1</sup> (Figure S4 a,b).

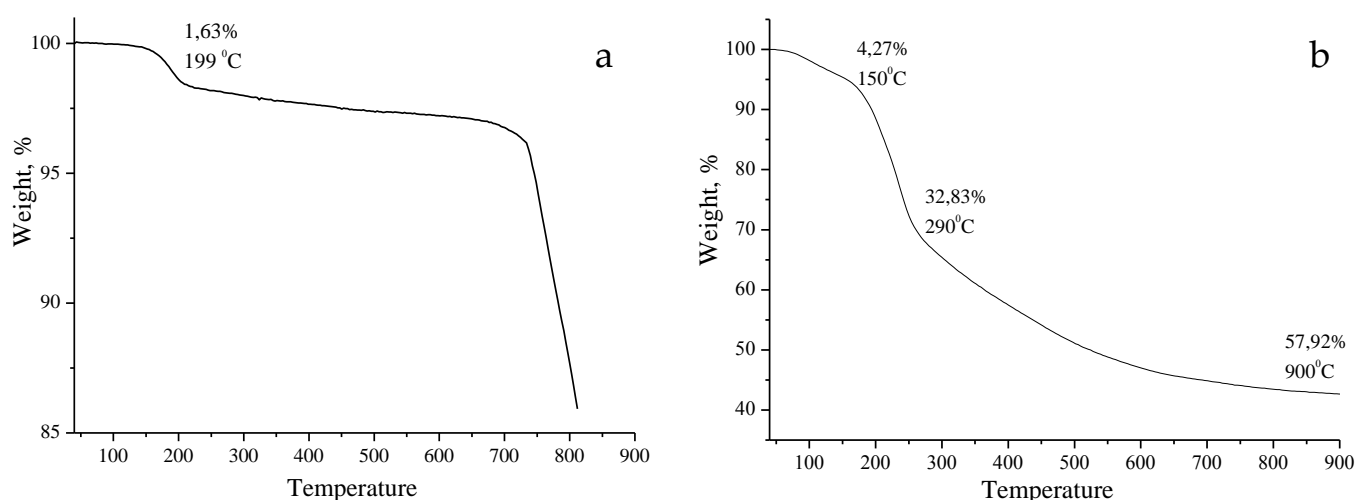

**Figure S4.** TGA chart for measuring the weight loss (wt%) of  $\text{Gd@C}_{82}\text{O}_x(\text{OH})_y$ ,  $x+y=40-44$  (a) and  $\text{Gd@C}_{82}\text{O}_x(\text{OH})_y$ ,  $x+y=20-24$  (b)

In Figure S4a, an initial weight loss (1,63 wt%) of the sample  $\text{Gd@C}_{82}\text{O}_x(\text{OH})_y$ ,  $x+y=40-44$  is evident from 140-200°C; it indicates the loss of bound water molecules. The weight degradation observed higher than 731°C, it is attributed to the sublimation of  $\text{C}_{82}$  molecules [100-101]. An initial weight loss of the sample  $\text{Gd@C}_{82}\text{O}_x(\text{OH})_y$ ,  $x+y=20-24$  was observed from 120-180°C (Figure S4b), indicating the loss of bound water molecules (4.27%). Weight

loss (32.33 wt%) at 210-290°C corresponds to CO<sub>2</sub> loss. Next, a gradual weight loss occurs (57.92 wt%), which is apparently due to the sublimation of C<sub>82</sub> molecules.

The study of fullerlenols (sample 1(S1) and sample 2(S2)) were carried out by X-ray photoelectronic spectroscopy (XPS) using UNI-SPECS spectrometer, SPECS GmbH. Figure S5 shows the carbon C1s spectrum lines; three lines were found in both samples after Lorentz decomposition. The line with the maximum at 284.7 eV corresponds to the bond between the carbon atoms in the C<sub>82</sub> molecule. The line with the maximum at 286.2 eV corresponds to the hydroxyl bond C-OH, and the peak is at 289 eV does to carbonyl bond C=O. The peaks areas of C 1s from XPS spectra of fullerlenols (S1 and S2) are presented in Table S1.

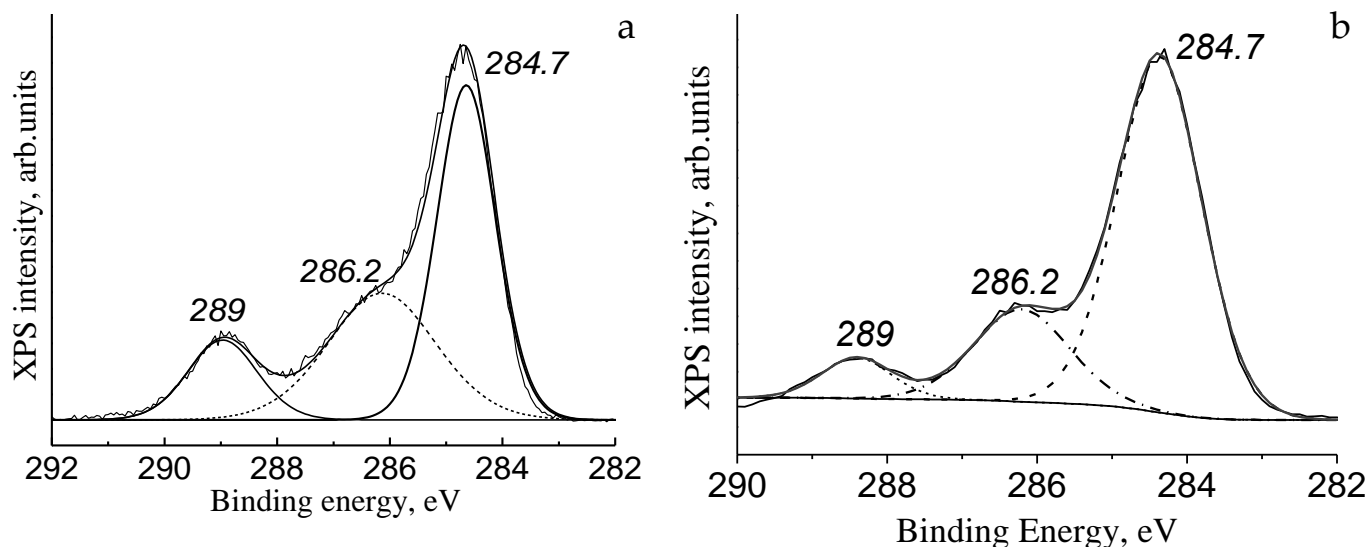

**Figure S5.** XPS C1s line of S1 (a) and S2 (b)

**Table S1.** The peaks area analysis of C1s from XPS spectra of fullerlenols

| Sample | Peak area (%) |      |      |
|--------|---------------|------|------|
|        | C-C           | C-O  | C=O  |
| S1     | 50.6          | 35.2 | 14.2 |
| S2     | 72.6          | 19.3 | 8.1  |

The number of these functional groups was calculated on the basis of XPS of S1 and S2, based on the proportion of carbon atoms chemically bonded with oxygen. Given that the number of -OH groups attached to the fullerene must be even [102], the composition of the product, determined on the basis of the XPS analysis, can be presented as S1 – Gd@C<sub>82</sub>O<sub>x</sub>(OH)<sub>y</sub>, where x+y=40-42 and S2 – Gd@C<sub>82</sub>O<sub>x</sub>(OH)<sub>y</sub>, where x+y=20-24.
